# Supplementary material for: Titanium aminophosphates: synthesis, characterization and crystal violet dye degradation studies
Source: Royal Society of Chemistry journal article supplement (doi:10.1039/c5ra22210a), 2015-12-03
Supplement: c5ra22210a1.pdf [file c5ra22210a1.pdf]

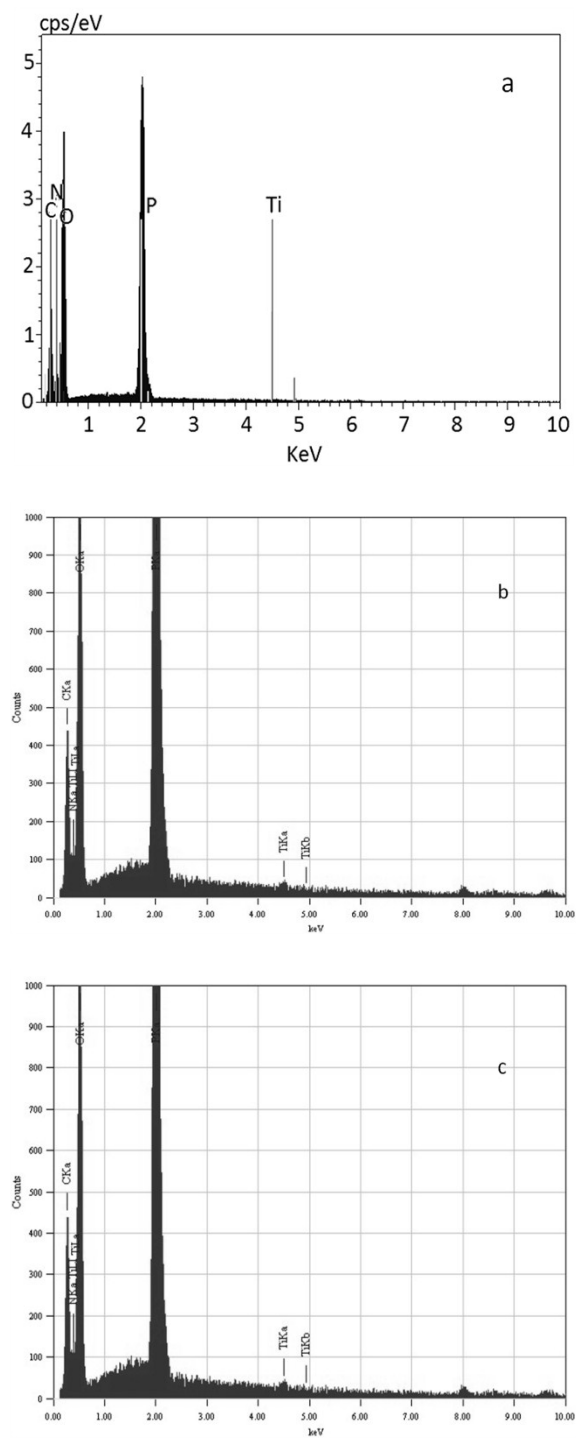

**Fig. 1:** Energy dispersive X-ray analysis of a) TNPAP, b) TNOAP and c)

# TNDDAP.

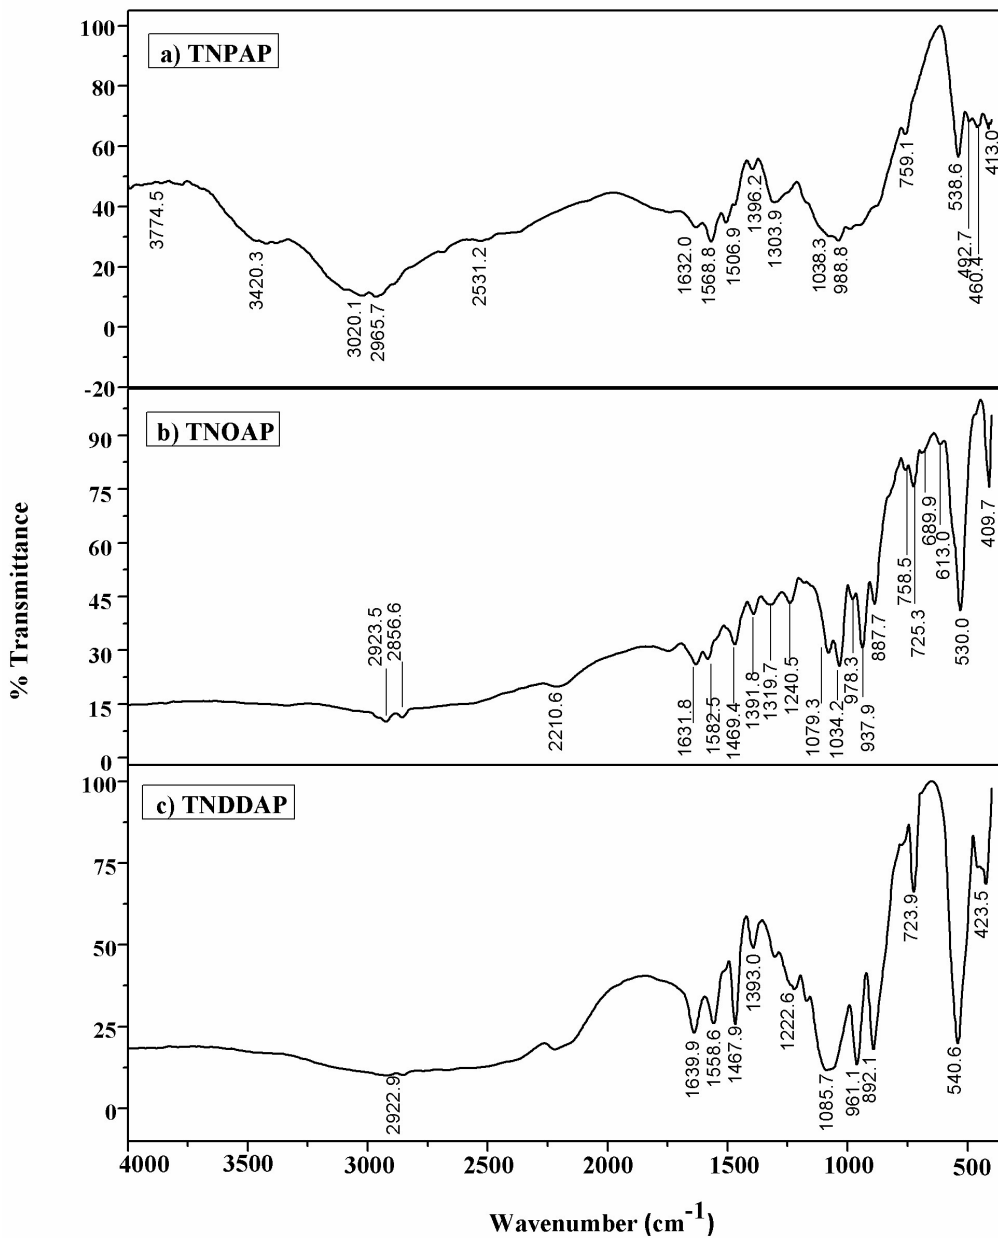

**Fig. 2:** Fourier transform Infrared spectra of a) TNPAP, b) TNOAP and c) TNDDAP.

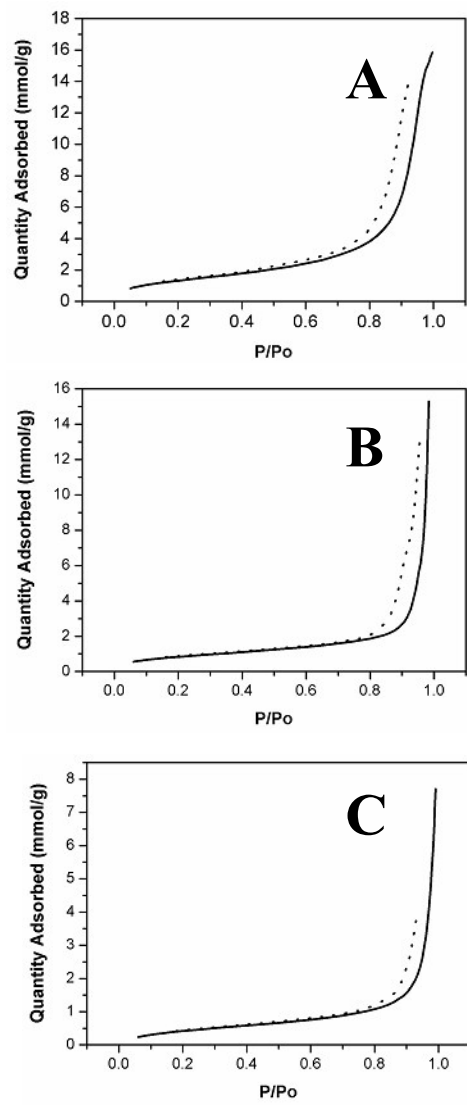

**Fig. 3** BET – Adsorption isotherm of A) TNDDAP, B) TNOAP and C) TNPAP.

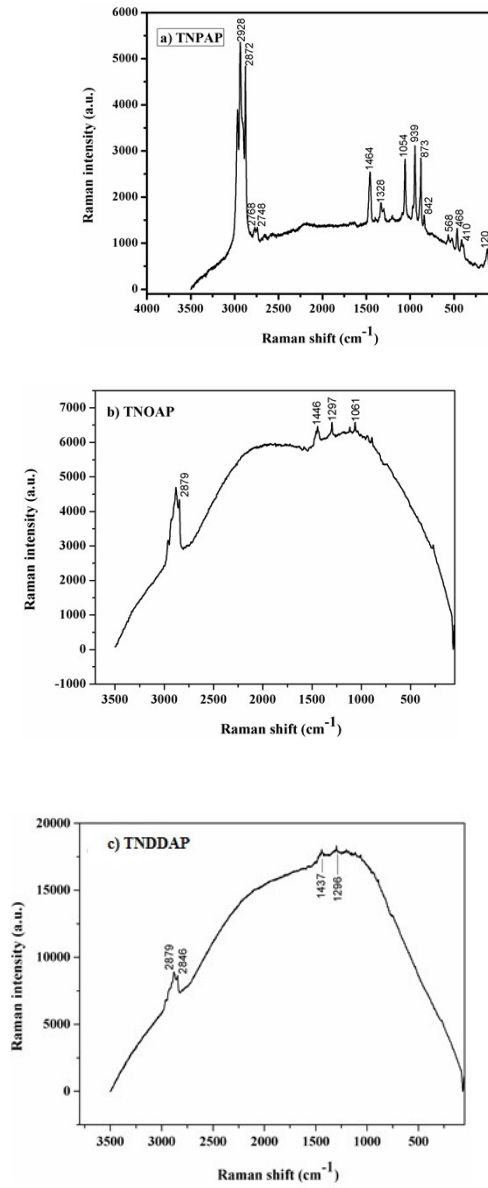

**Fig. 4: Dispersive Raman spectra of a) TNPAP, b) TNOAP and c) TNDDAP.**

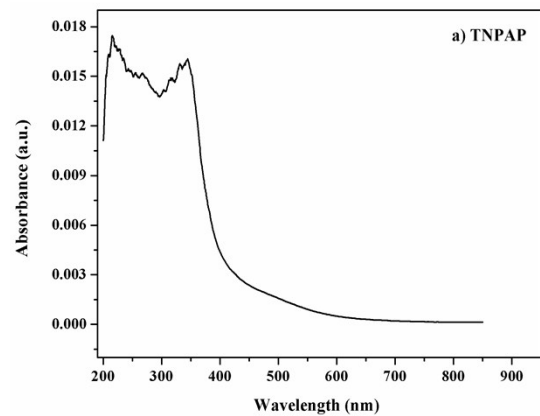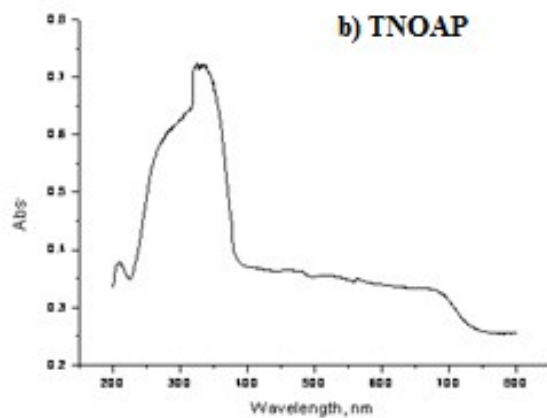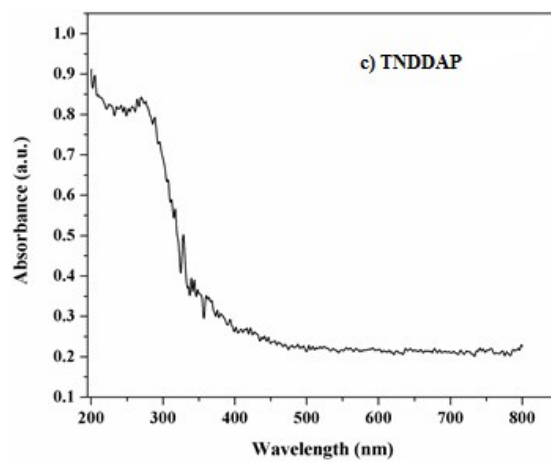

Fig. 5: Ultraviolet - vis DRS spectra of a) TNPAP, b) TNOAP and c) TNDDAP.

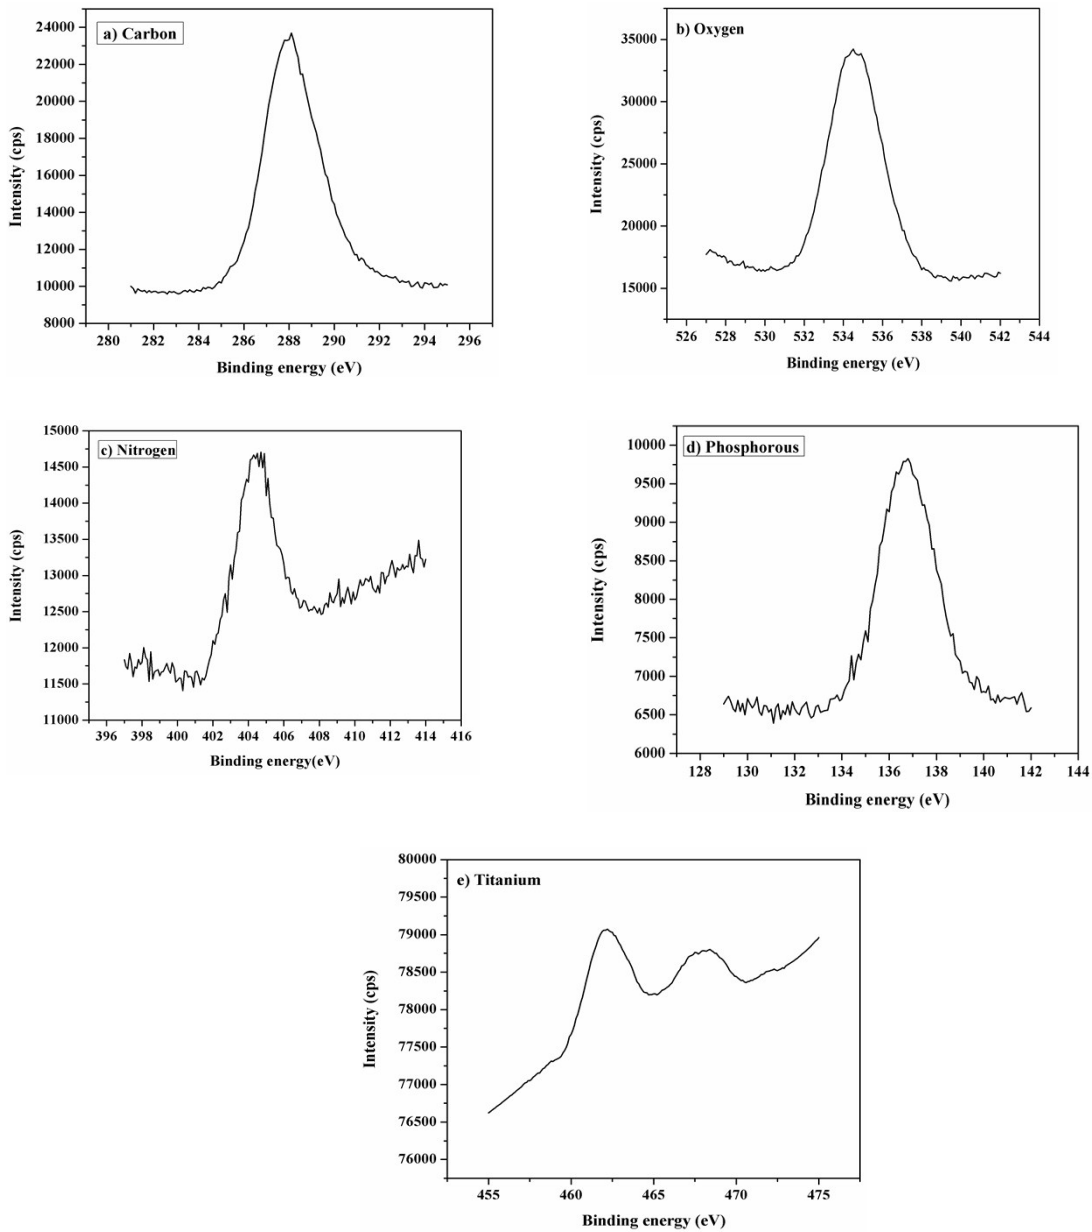

**Fig. 6: X-ray photoelectron spectra of a) carbon b) oxygen c) nitrogen d) phosphorous and e) titanium ion in TNAP.**

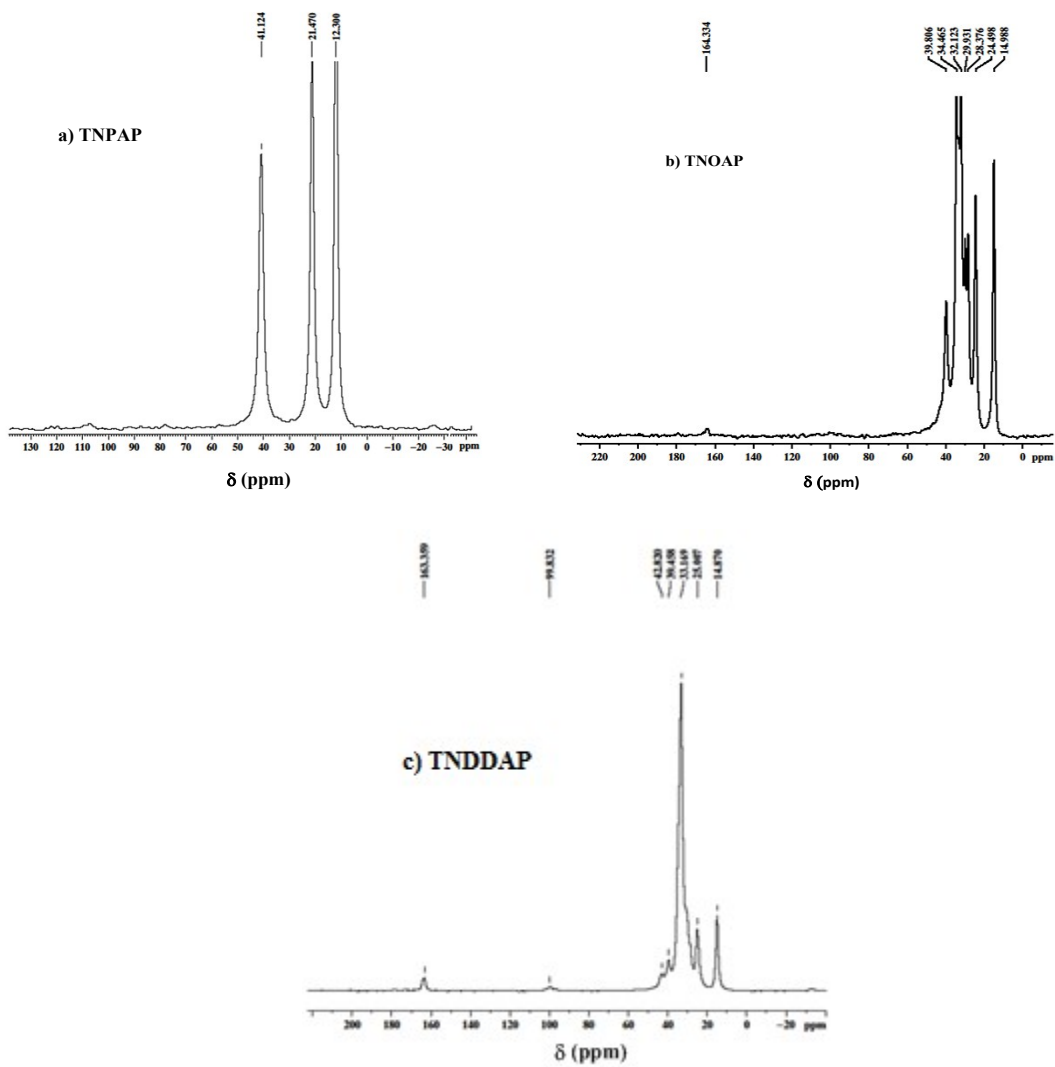

**Fig. 7:**  $^{13}\text{C}$  Magic angle spinning Nuclear magnetic resonance spectra of a) TNPAP, b) TNOAP and c) TNDDAP.

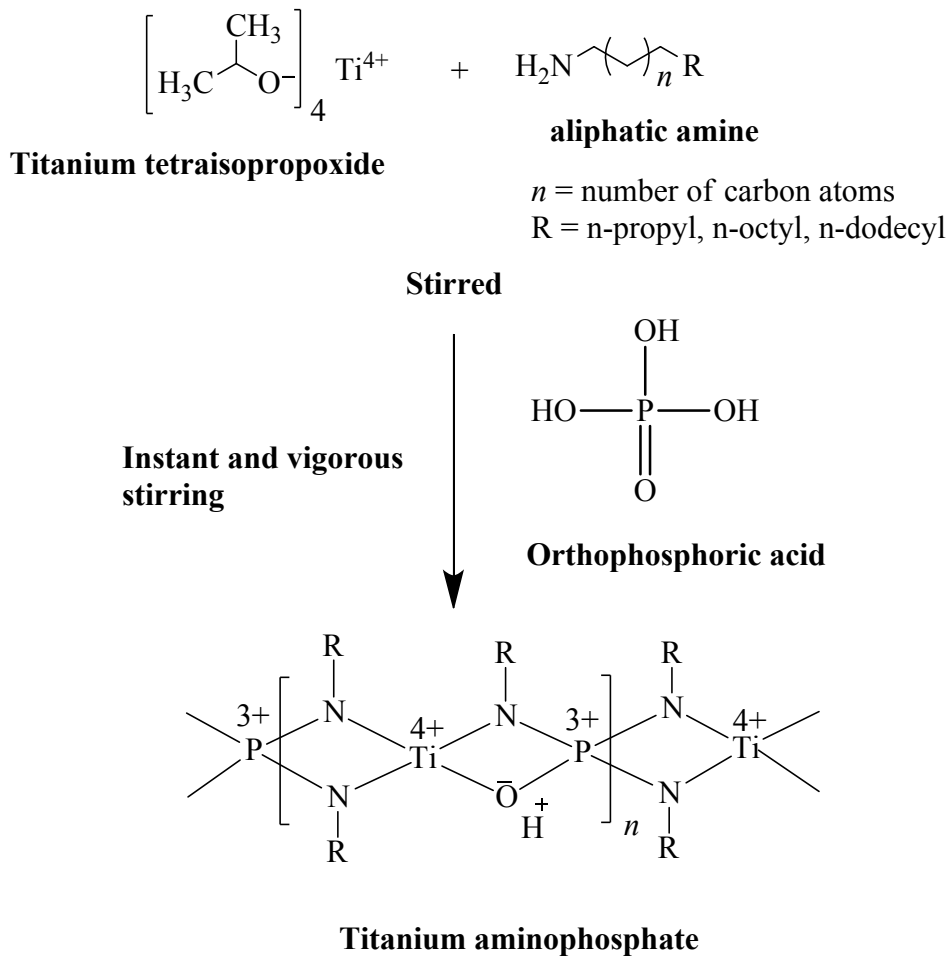

**Fig. 8 :**      **Synthesis scheme and proposed basic structure of titanium aminophosphate.**



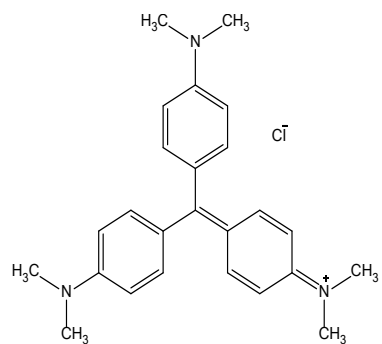

**Fig. 9 :**      **Structure of crystal violet dye.**

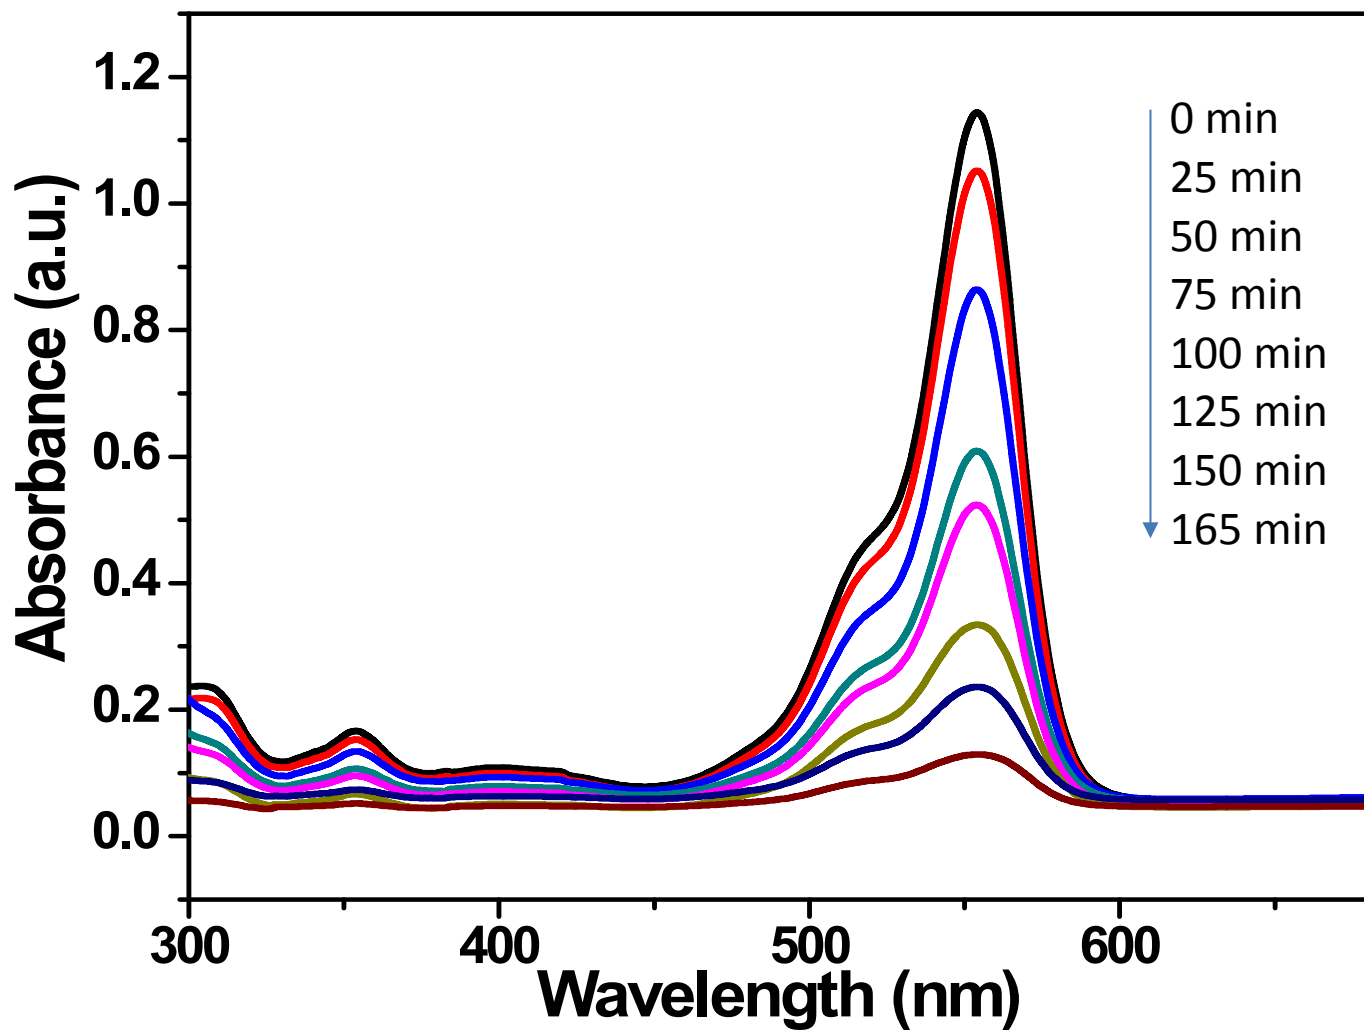

Fig. 10 : Crystal violet degradation (%) with respect to time and wavelength.
